# Supplementary material for: Targeted nanocarriers based on iodinated-cyanine dyes as immunomodulators for synergistic phototherapy
Source: Royal Society of Chemistry journal article supplement (doi:10.1039/c9nr10674j), 2020-01-01
Supplement: c9nr10674j1.pdf [file c9nr10674j1.pdf]

## Targeted Nanocarriers Based on Iodinated-Cyanine Dyes as Immunomodulators for Synergistic Phototherapy

Jinnan Chi <sup>a, #</sup>, Qingming Ma <sup>a, #</sup>, Zijun Shen <sup>a</sup>, Caiyun Ma <sup>a</sup>, Wei Zhu <sup>b</sup>, Shangcong Han <sup>a</sup>, Yan  
Liang <sup>a</sup>, Jie Cao <sup>a, \*</sup>, Yong Sun <sup>a</sup>

<sup>a</sup> Department of Pharmaceutics, School of Pharmacy, Qingdao University, Qingdao, China,  
266021

<sup>b</sup> Department of Pharmacology, School of Pharmacy, Qingdao University, Qingdao, China, 266021

<sup>#</sup>These authors contributed equally to this manuscript

\*Corresponding to [caojie0829@qdu.edu.cn](mailto:caojie0829@qdu.edu.cn)

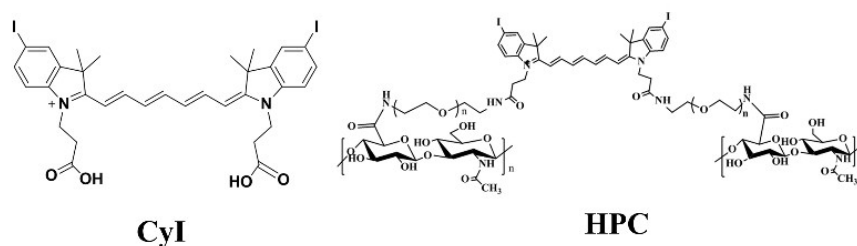

Figure S1. The chemical structure of CyI and HPC.

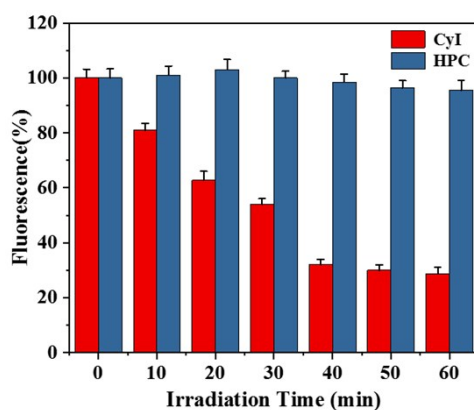

Figure S2. Photostability of HPC by compared with free CyI.

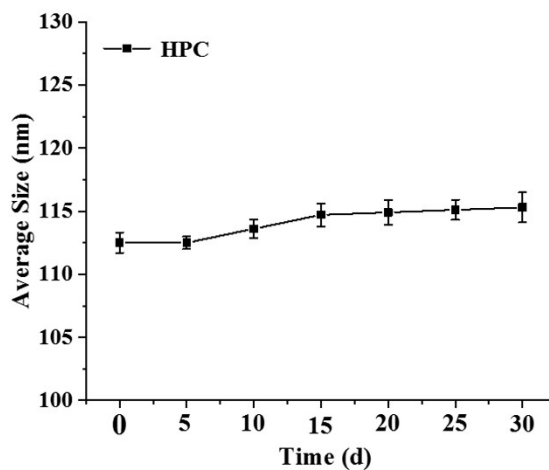

Figure S3. Average size changes of HPC within 30 days.

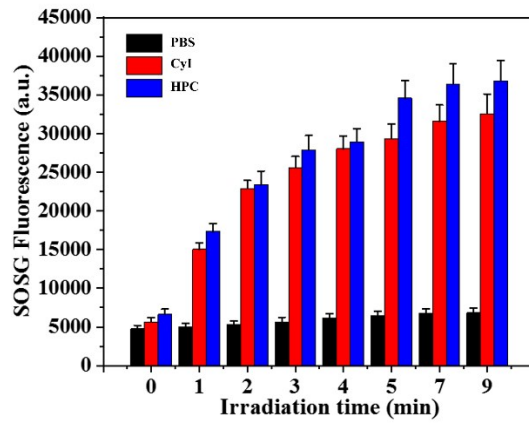

Figure S4. Singlet oxygen generation of PBS, CyI and HPC (400  $\mu\text{g/mL}$  CyI-equiv.) after NIR irradiation ( $0.96 \text{ W/cm}^2$ ) with different time.

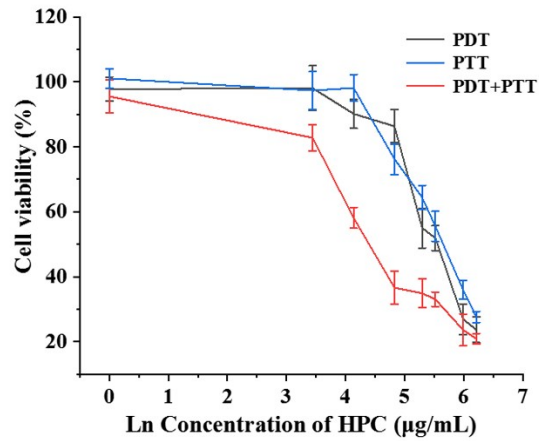

Figure S5. The cell viability of 4T1 cells after incubation with different concentration HPC under different therapy.
